# Supplementary material
Source: publisher figshare collection journal article supplement (https://acs.figshare.com/ndownloader/files/4034560)
Supplement: Supplementary file 1 [file 4034560]

## Supporting Information: Deconvoluting the Reactivity of Two Intermediates Formed From Modified Pyrimidines.

Liwei Weng<sup>a</sup>, Sonia M. Horvat<sup>b,c</sup>, Carl H. Schiesser<sup>b,c</sup>, and Marc M. Greenberg<sup>\*a</sup>

<sup>a</sup>Department of Chemistry, Johns Hopkins University, 3400 N. Charles St., Baltimore MD 21218.

<sup>b</sup>Australian Research Council Centre of Excellence for Free Radical Chemistry and Biotechnology, Australia. <sup>c</sup>School of Chemistry and Bio21 Molecular Science and Biotechnology Institute, The University of Melbourne, Victoria, 3010, Australia.

mgreenberg@jhu.edu

### Contents:

1. Experimental Methods. (S1-6)
2. **Supporting Information Table 1.** Response factors and retention time using MeU as internal standard. (S3)
3. **Figure S1.** <sup>1</sup>H NMR spectra of 3', 5'-*O*-diacetyl-5-(*N*-methoxymethylamine)-2'-deoxyuridine and 3', 5'-*O*-diacetyl-5-(*t*-butylthiomethyl)-2'-deoxyuridine. (S7)
4. **Figure S2.** <sup>1</sup>H NMR and <sup>13</sup>C NMR spectra of **11**. (S8)
5. **Figure S3.** <sup>1</sup>H NMR and <sup>13</sup>C NMR spectra of **14**. (S9)
6. **Figure S4.** <sup>1</sup>H NMR and <sup>13</sup>C NMR spectra of **15**. (S10)
7. **Figure S5.** Effect of methoxyamine on product distribution from **5** under anaerobic conditions. (S11)
8. **Figure S6.** Effect of methoxyamine on interstrand cross-link formation from **5** (**17**) under anaerobic conditions. (S11)
9. **Figure S7.** Chromatograms of digested duplex **17** photolyzed in the presence of methoxyamine. (S12)
10. **Figure S8.** Chromatograms of digested duplex **17** photolyzed in the presence of HO-TEMPO (**13**). (S12)
11. **Figure S9.** BHandHLYP/6-311G(d,p) generated orbitals for the key bond-forming interactions in **21**. (S13)
12. **Table S2.** Effect of HO-TEMPO (**13**) on interstrand cross-link (ICLs) yields from **17** under anaerobic conditions. (S14)
13. **Table S3.** Effect of HO-TEMPO (**13**) on interstrand cross-link (ICLs) yields from **17** under aerobic conditions. (S14)
14. **Table S4.** Calculated energy barriers ( $\Delta E^\ddagger$ , Scheme 5) at all levels of theory used. (S14)
15. Optimized geometries (Gaussian Archive Entries) for **21**. (S15-21)

**General Methods.** All solvents were distilled before use. *tert*-Butylthiol was distilled over CaO. Dichloromethane, benzene, triethylamine and DMF were distilled from CaH<sub>2</sub>. All photolyses were conducted in Pyrex tubes using a Rayonet photoreactor (RPR-100) equipped with 16 lamps with a maximum output at 350 nm. Anaerobic photolyses were carried out in sealed Pyrex tubes using standard freeze-pump-thaw cycles (three times). The oligonucleotide used here was the same as previously reported.<sup>[1]</sup> Radiolabeling was conducted using standard protocols,<sup>[2]</sup> which was followed

by hybridization with 1.5 eq. of complementary oligonucleotide in 10 mM potassium phosphate (pH 7.2) and 100 mM NaCl at 65 °C for 15 min and cooled to room temperature. Quantification of radiolabel oligonucleotides was carried out using a Molecular Dynamics phosphorimager equipped with ImageQuant Version TL software. LC samples were analyzed using an Agilent 1290 Infinity, with a RP-18 column (VARIAN, Microsorb-MV 100-5 C18 250 × 4.6 mm).

**Photoreaction of oligonucleotides.** Photoreactions of duplex DNA (20 nM) were carried out in 100 mM sodium phosphate (pH 7.2) buffer. The stock solution of MeO-NH<sub>2</sub>•HCl (2 M) was titrated with 5 M NaOH solution to adjust the pH to ~ 7.0. It was then added to the photolysis mixture as appropriate for the desired concentration. HO-TEMPO (**13**) was dissolved in H<sub>2</sub>O without adjusting the pH. After 1.5 h photolysis, an aliquot was mixed in 1:1 ratio with 90% formamide loading buffer and subjected to 20% denaturing PAGE analysis.

**Photoreaction of monomers 4 and 5.** Monomers **4** or **5** was dissolved in CH<sub>3</sub>CN/H<sub>2</sub>O (1:1) in stock solution (20 mM) and diluted with H<sub>2</sub>O in reactions. Photoreaction solutions typically contained 50 μM of **4** or **5** and 100 mM phosphate buffer (pH 7.2), together with 10 μM of the internal standard 5-methyl-uridine (MeU). Photolyses were carried out for 1.5 h. Methoxyamine and HO-TEMPO solutions were prepared and added as described above. *t*-Butylthiol was dissolved in CH<sub>3</sub>CN (1 M) and diluted by H<sub>2</sub>O in the photolysis reaction as appropriate for the desired concentration. The general gradient employed to analyze the photolysate was 0-12.5 min, 3-11.5% B in A; 12.5-15 min, 11.5-50% B in A; 15-20 min, 50-80% B in A; at a flow rate 1.0 mL/min. [A: H<sub>2</sub>O; B: CH<sub>3</sub>CN]. The photoreactions containing **13** were analyzed using a different gradient: 0-1, 3% B in A; 1-13.5 min, 3-11.5% B in A; 13.5-16 min, 11.5-15% B in A; 16-25 min, 15-35% B in A, 25-28 min, 35-80% B in A; at a flow rate 1.0 mL/min. [A: H<sub>2</sub>O; B: CH<sub>3</sub>CN].

**Determination of response factors.** Response factors for compounds at 260 nm were calculated versus 5-methyluridine (MeU) as an internal standard. The following formula was used to calculate response factors ( $[X]/[IS]=Rf(A(X)/A(IS))$ ), where  $[X]$  is the concentration of the compound of interest and  $[IS]$  is the concentration of the internal standard.  $A(X)$  and  $A(IS)$  are the areas under the peaks corresponding to the compound of interest and the internal standard, respectively (SI Table 1).

**Supporting Information Table 1.** Response factors and retention time using MeU as internal standard.

| Compound  | Response Factor    | Retention time (min) |
|-----------|--------------------|----------------------|
| Thymidine | 0.83               | 7.59                 |
| <b>4</b>  | 0.882              | 16.98                |
| <b>5</b>  | 1.036              | 16.94                |
| <b>7</b>  | 0.942              | 5.08                 |
| <b>8</b>  | 0.942 <sup>a</sup> | 5.75                 |
| <b>11</b> | 1.293              | 16.79                |
| <b>14</b> | 0.779              | 20.72                |
| <b>15</b> | 0.844              | 7.04                 |

<sup>a</sup>. The response factor for **8** was assumed to be the same as **7**.

**Digestion of photolyzed duplex 17.** The hybridized **17** (2 nmol) with the complementary strand (2.5 nmol) was photolyzed at 350 nm in the presence of 300 mM methoxyamine or 200 mM **13** for 4 h. The stock solutions of 3 M methoxyamine and 2 M **13** were prepared as described above. The photolyzed duplex was precipitated twice from 0.3 M NaOAc (pH 5.2) followed by washing with 70% cold ethanol. The pellet was then suspended in 17.5  $\mu$ L 1  $\times$  Antarctic phosphatase buffer (50 mM Bis-Tris-Propane HCl, 1 mM MgCl<sub>2</sub>, 0.1 mM ZnCl<sub>2</sub>, pH 6.0 at 25 °C), to which was added 1  $\mu$ L of nuclease P1 (1 unit/ $\mu$ L), 1  $\mu$ L phosphodiesterase II (bovine spleen, 10 unit/ $\mu$ L) and 0.5  $\mu$ L DNase II (10 unit/ $\mu$ L). After the mixture was incubated at 37 °C for 2 h, 3  $\mu$ L of 10  $\times$  NEB buffer 3 (1 M NaCl, 500 mM Tris-HCl, 100 mM MgCl<sub>2</sub>, 1 mg/mL BSA, pH 7.9 at 25 °C) with 2.4  $\mu$ L 500 mM MgCl<sub>2</sub>, 1  $\mu$ L phosphodiesterase I (snake venom, 0.105 unit/ $\mu$ L), 1  $\mu$ L shrimp alkaline phosphatase (1 unit/ $\mu$ L) and

2.6  $\mu\text{L}$   $\text{H}_2\text{O}$  were added. The resulting solution was incubated at 37  $^\circ\text{C}$  for 2 h followed by filtration through 0.22  $\mu\text{m}$ . Half of the filtrate ( $\sim 15$   $\mu\text{L}$ ) was directly subject to LC analysis. The remaining solution ( $\sim 15$   $\mu\text{L}$ ) was mixed with 200 pmol of **15** or 250 pmol of **14** before LC analysis.

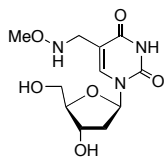

**Synthesis of 5-(*N*-methoxymethylamine)-2'-deoxyuridine (**15**).** To a solution of 3', 5'-*O*-diacetyl-2'-deoxyuridine (150 mg, 0.46 mmol) in distilled benzene (5 mL) was added *N*-bromosuccinimide (106 mg, 0.6 mmol) and azobisisobutyronitrile (AIBN, 8 mg, 0.06 mmol). The mixture was heated to reflux for 3 h, during which time the color changed from colorless to orange. The solution was cooled down and the solvent was removed to give the crude allylic bromide (**12**), which was used without purification. To a solution of  $\text{MeO-NH}_2\cdot\text{HCl}$  (76.8 mg, 0.92 mmol) in DMF (2.5 mL), was added triethylamine (TEA, 130  $\mu\text{L}$ , 0.92 mmol) via syringe. White precipitate crushed out upon the addition of TEA. The mixture was stirred at 25  $^\circ\text{C}$  for 1 h. A solution of **12** in DMF (2.5 mL) was then added. After stirring overnight, the mixture was poured into a beaker containing 30 mL of water and extracted with methylene chloride. The organic phases were combined, washed with water, and brine. Evaporation of the solvent gave the crude product, which was purified by flash chromatography ( $\text{CH}_2\text{Cl}_2$ :MeOH, 50:1) to give a pale yellow foam (45 mg, 26% for two steps):  $^1\text{H-NMR}$  ( $\text{CDCl}_3$ )  $\delta$  9.13 (br, 1H), 7.49 (s, 1H), 6.29 (dd, 1H,  $J = 7.2, 4.8$  Hz), 5.18-5.15 (m, 1H), 4.39-4.17 (m, 3H), 3.81-3.64 (m, 2H), 3.47 (s, 3H), 2.44 (ddd, 1H,  $J = 11.9, 4.1, 1.4$  Hz), 2.15 (ddd, 1H,  $J = 11.9, 7.5, 3.2$  Hz), 2.08 (s, 3H), 2.05 (s, 3H). 3', 5'-*O*-Diacetyl-5-(*N*-methoxymethylamine)-2'-deoxyuridine (45 mg, 0.12 mmol) was dissolved in methanol (3 mL), to which was added a concentrated solution of ammonia in methanol (1 mL, 7 M). The resulting yellow solution was stirred overnight at room temperature. The solvent was evaporated and the residue was purified by flash column chromatography ( $\text{CH}_2\text{Cl}_2$ :MeOH, 10:1) to give **15** as a colorless solid (28 mg, 81%):  $^1\text{H-NMR}$  ( $\text{MeOH-d}_4$ )  $\delta$  8.05 (s, 1H), 6.32 (t, 1H,  $J = 11.2$  Hz), 4.45-4.41 (m, 1H), 3.95 (q, 1H,  $J$

= 3.6 Hz), 3.85-3.73 (m, 4H), 3.53 (s, 3H), 2.36-2.20 (m, 2H);  $^{13}\text{C}$ -NMR (MeOH- $\text{d}_4$ )  $\delta$  164.2, 150.7, 139.4, 109.7, 87.5, 85.1, 70.7, 61.4, 59.8, 39.9; IR (neat) 3394, 2940, 2345, 1734, 1691, 1679, 1469, 1276  $\text{cm}^{-1}$ ; HRMS  $m/z$  ( $\text{M}+\text{H}^+$ ) calc. 288.1190, found 288.1187.

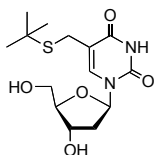

**Synthesis of 5-(*t*-butylthiomethyl)-2'-deoxyuridine (11).** The allylic bromide (**12**, 214mg, 0.46 mmol) was obtained by the same procedure as described above. To a suspension of NaH (44 mg, 60% in oil, 1.84 mmol) in DMF (2.5 mL) was added *t*-butylthiol (104 mL, 0.92 mmol) via syringe. After stirring the mixture at room temperature for 1 h, a solution of the allylic bromide in DMF (2.5 mL) was added. The resulting solution was stirred at room temperature overnight. The reaction was quenched by pouring into 30 mL water and extracted with methylene chloride. The organic phases were separated, washed with water, and brine. Evaporation of the solvent gave the crude product, which was purified by flash chromatography (hexane:ethyl acetate, 1:1) to give a yellow solid (80 mg, 42%):  $^1\text{H}$ -NMR ( $\text{CDCl}_3$ )  $\delta$  9.71-9.56 (m, 1H), 7.57 (s, 1H), 6.30 (t, 1H,  $J = 8.0$  Hz), 5.21 (dd, 1H,  $J = 6.4, 1.6$  Hz), 4.37-4.25 (m, 2H), 4.24-4.21 (m, 1H), 3.53-3.41 (m, 2H), 2.47 -2.41 (m, 1H), 2.16 (s, 3H), 2.07 (s, 3H), 1.30 (s, 9H). Similarly, the purified 3', 5'-*O*-diacetyl-5-*t*-butylthiomethyl-2'-deoxyuridine (80 mg, 0.19 mmol) was deprotected by a concentrated solution of ammonia in methanol (1 mL, 7 M). The solvent was evaporated after overnight stirring and the residue was purified by flash column chromatography ( $\text{CH}_2\text{Cl}_2$ :MeOH, 20:1) to give **11** as a white foam (63 mg, 100%):  $^1\text{H}$ -NMR (MeOH- $\text{d}_4$ )  $\delta$  8.05 (s, 1H), 6.31 (t, 1H,  $J = 6.6$  Hz), 4.45-4.42 (m, 1H), 3.96 (dd, 1H,  $J = 7.0, 3.4$  Hz), 3.82 (dd, 1H,  $J = 11.8, 3.4$  Hz), 3.77 (dd, 1H,  $J = 11.8, 3.8$  Hz), 3.56-3.48 (m, 2H), 2.34-2.21 (m, 2H), 1.36 (s, 9H);  $^{13}\text{C}$ -NMR (MeOH- $\text{d}_4$ )  $\delta$  163.6, 150.6, 138.4, 112.1, 87.5, 85.1, 70.8, 61.5, 42.3, 39.9, 29.8, 23.6, 20.7; IR (neat) 3369, 2926, 2346, 1734, 1666, 1469, 1277  $\text{cm}^{-1}$ ; HRMS  $m/z$  ( $\text{M}+\text{H}^+$ ) calc. 331.1322, found 331.1316.

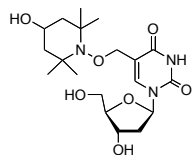

**Synthesis of 14.** Monomer **4** (50 mg, 0.13 mmol) was mixed with **13** (216.8 mg, 1.3 mmol) in 3 mL CH<sub>3</sub>CN/H<sub>2</sub>O (1:1) in a Pyrex tube. Argon was bubbled through the solution for 0.5 h. The photolysis was carried out for 3 h under argon. The solvent was

evaporated *in vacuo* to yield the crude product, which was subjected to flash column chromatography (CH<sub>2</sub>Cl<sub>2</sub>:MeOH, 10:1) to give **14** as a white foam (5 mg, 9%): <sup>1</sup>H-NMR (MeOH-d<sub>4</sub>) δ 8.07 (s, 1H), 6.3 (t, 1H, *J* = 6.6 Hz), 4.53 (d, 1H, *J* = 11.0 Hz), 4.48 (d, 1H, *J* = 11.0 Hz), 4.42-4.39 (m, 1H), 3.95-3.82 (m, 2H), 3.77 (dd, 1H, *J* = 11.8, 3.4 Hz), 3.72 (dd, 1H, *J* = 11.8, 3.4 Hz), 2.35-2.18 (m, 2H), 1.80-1.73 (m, 2H), 1.48-1.41 (m, 2H), 1.29 (s, 3H), 1.24 (s, 3H), 1.17 (s, 3H), 1.16 (s, 3H); <sup>13</sup>C-NMR (MeOH-d<sub>4</sub>) δ 150.8, 139.6, 128.0, 110.6, 87.6, 85.2, 71.0, 70.6, 62.0, 61.5, 60.0, 40.1, 32.3, 29.0, 20.1; IR (neat) 3369, 2926, 1678, 1470, 1275, 1050 cm<sup>-1</sup>; HRMS *m/z* (M+H<sup>+</sup>) calc. 414.2235, found 414.2244.

[1] Hong, I. S.; Ding, H.; Greenberg, M. M. *J. Am. Chem. Soc.* **2006**, *128*, 485-491

[2] Maniatis, T.; Fritsch, E. F.; Sambrook, J. *Molecular Cloning*; Cold Spring Harbor Laboratory, Cold Spring Harbor, NY., **1982**.

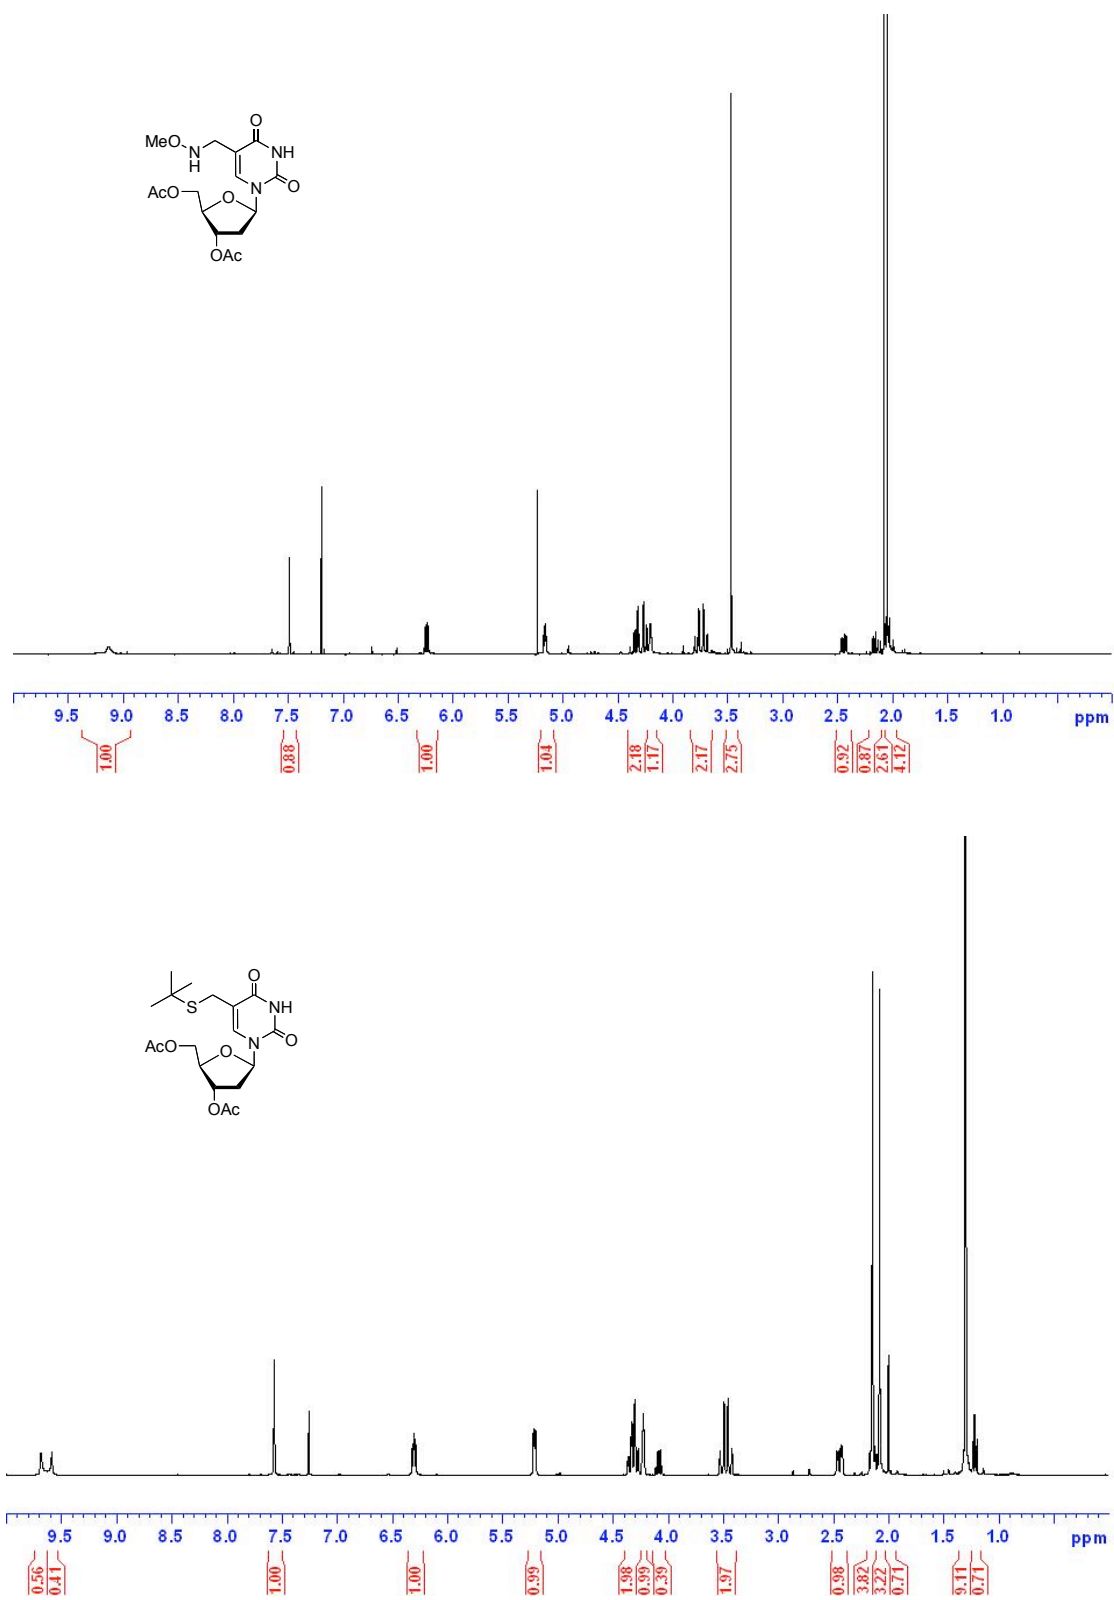

**Figure S1.** <sup>1</sup>H NMR spectra of 3', 5'-O-diacetyl-5-(N-methoxymethylamine)-2'-deoxyuridine and 3', 5'-O-diacetyl-5-(*t*-butylthiomethyl)-2'-deoxyuridine.

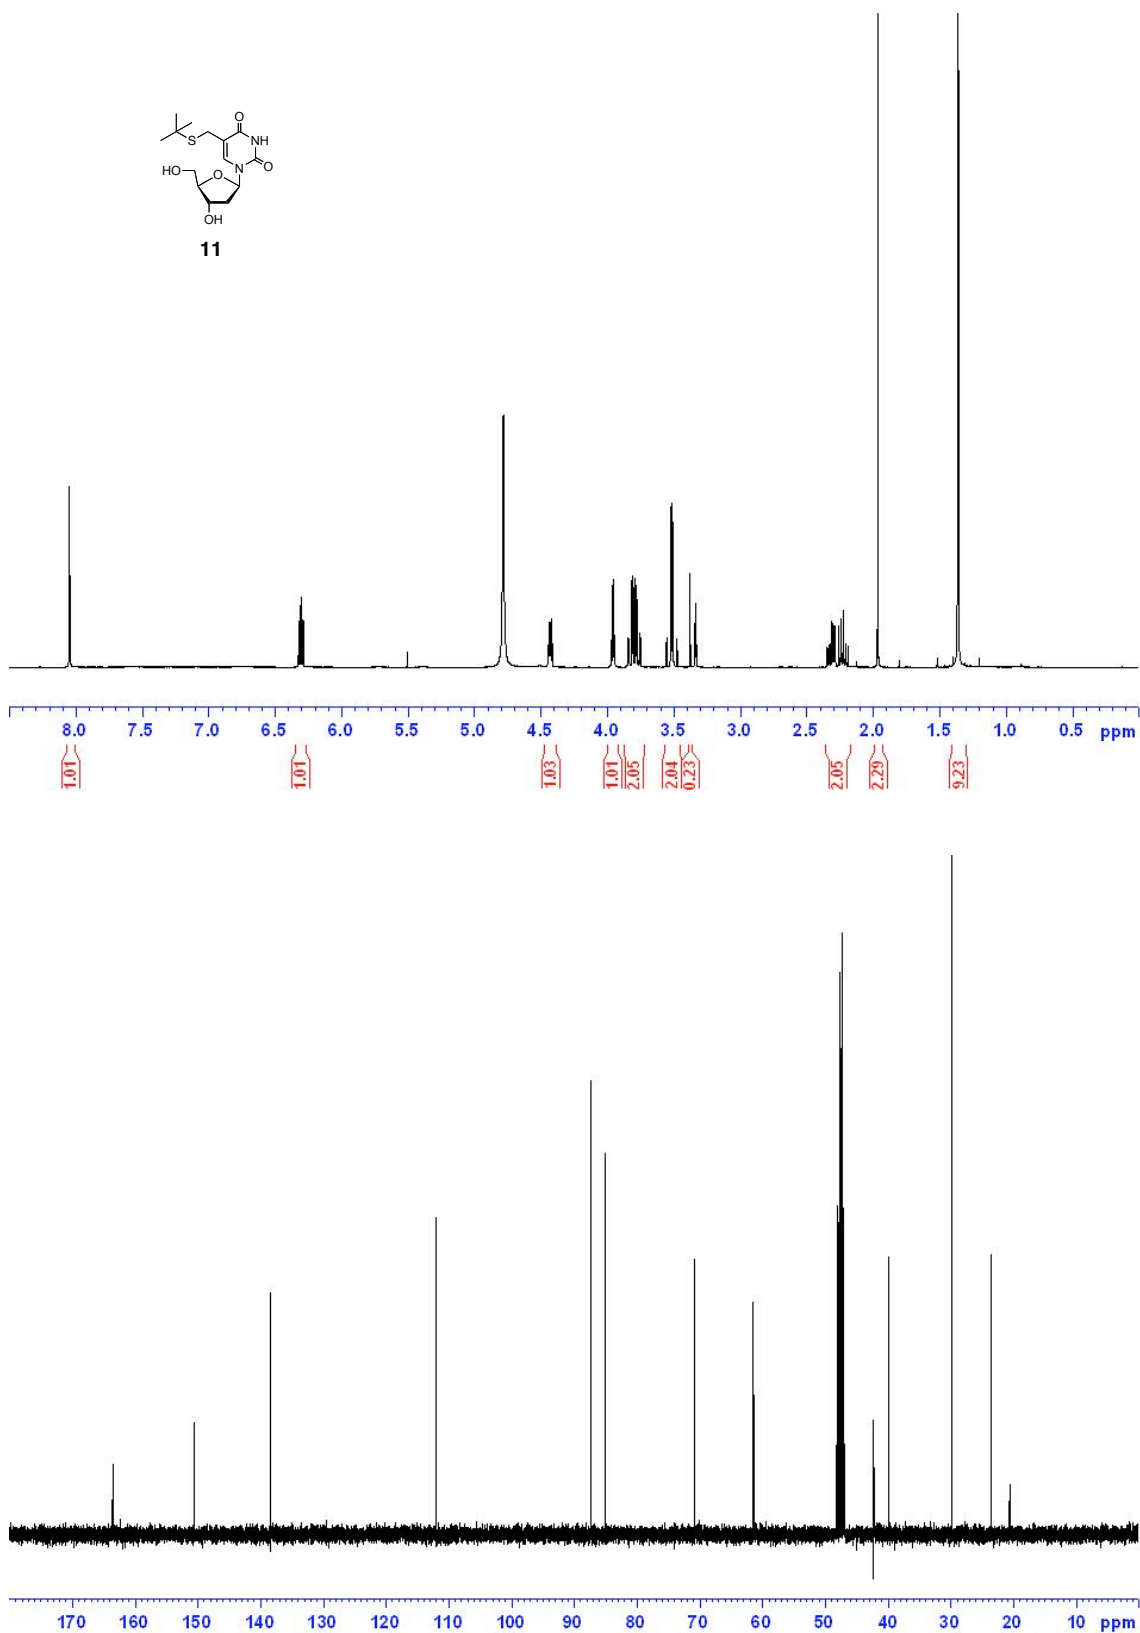

**Figure S2.**  $^1\text{H}$  NMR and  $^{13}\text{C}$  NMR spectra of **11**.



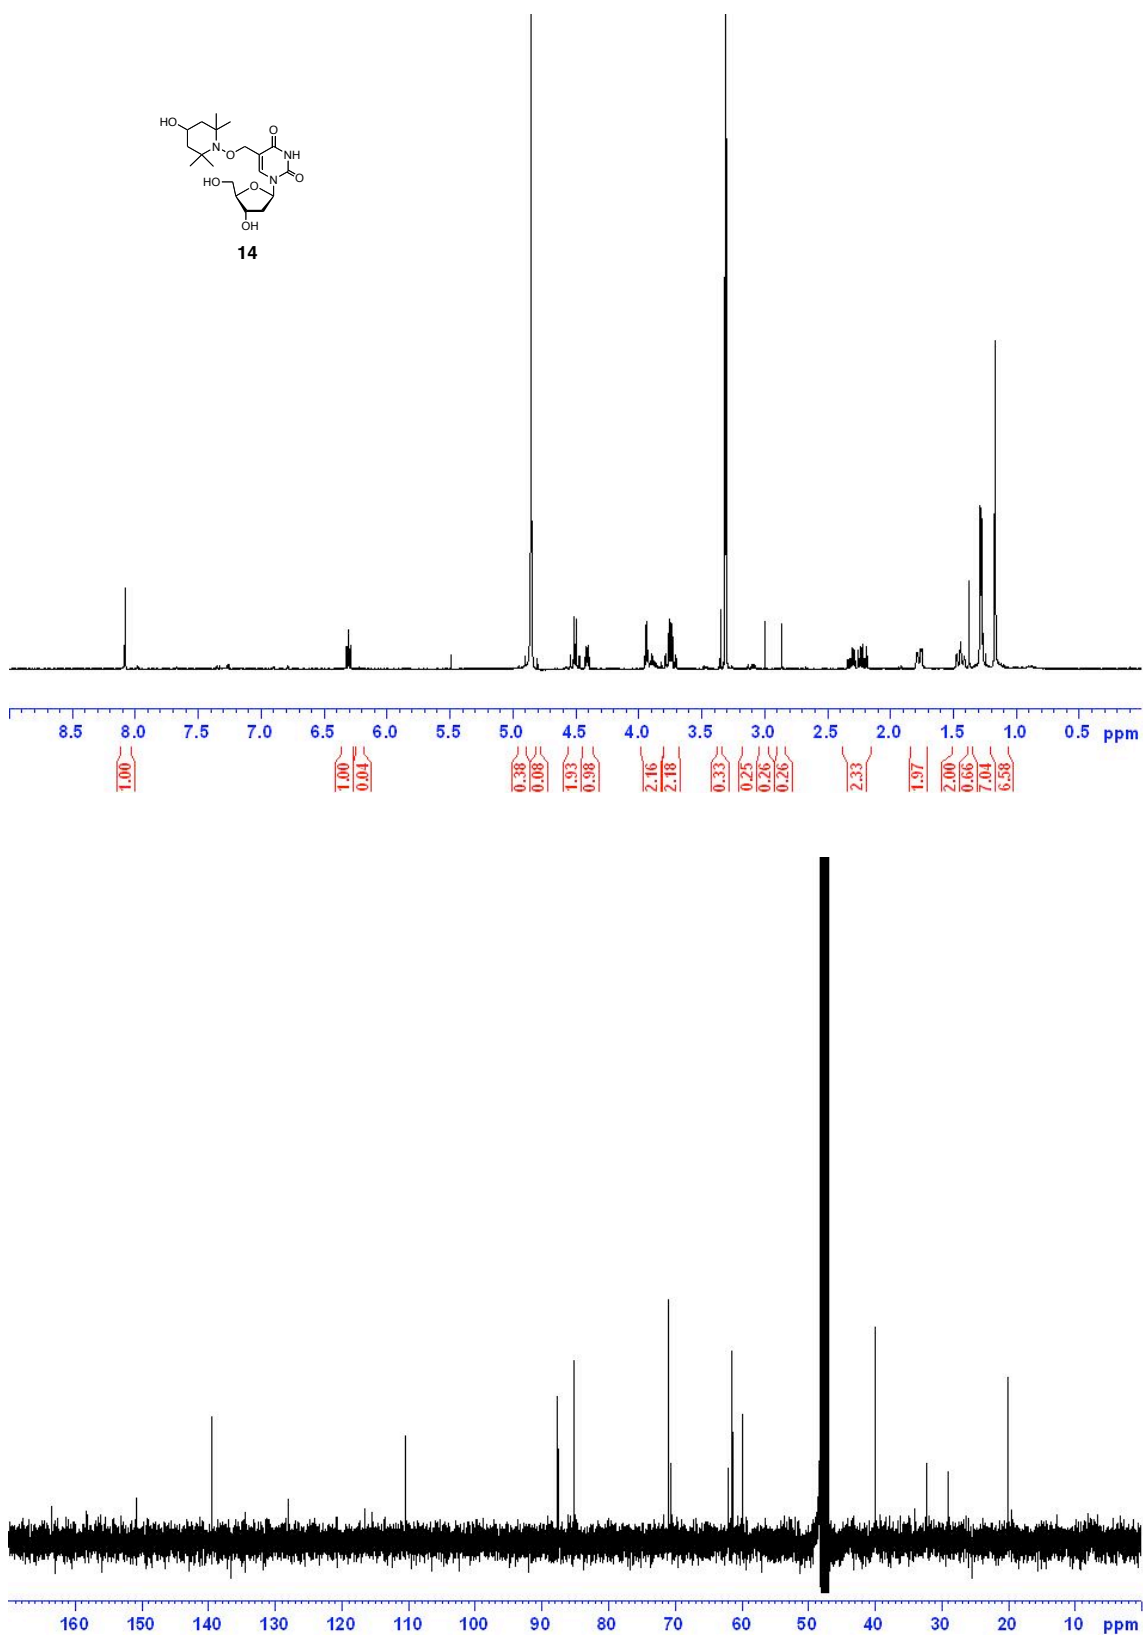

**Figure S3.** <sup>1</sup>H NMR and <sup>13</sup>C NMR spectra of **14**.

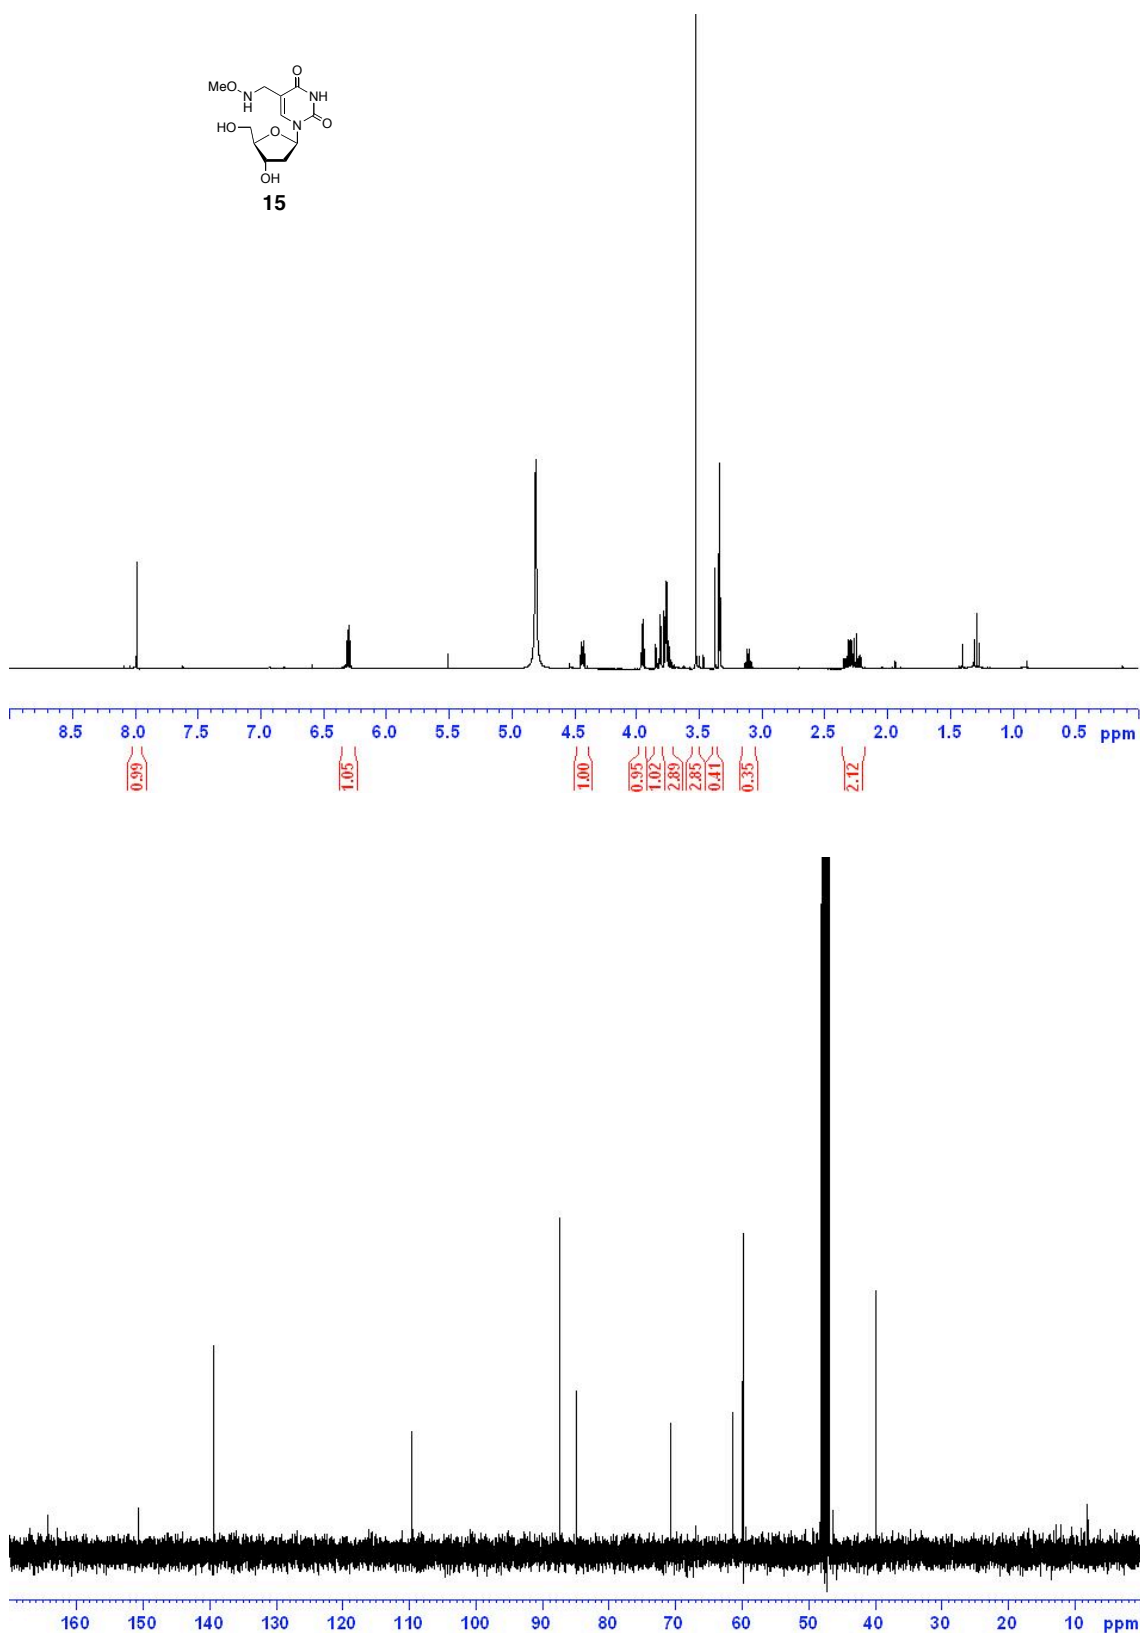

**Figure S4.**  $^1\text{H}$  NMR and  $^{13}\text{C}$  NMR spectra of **15**.

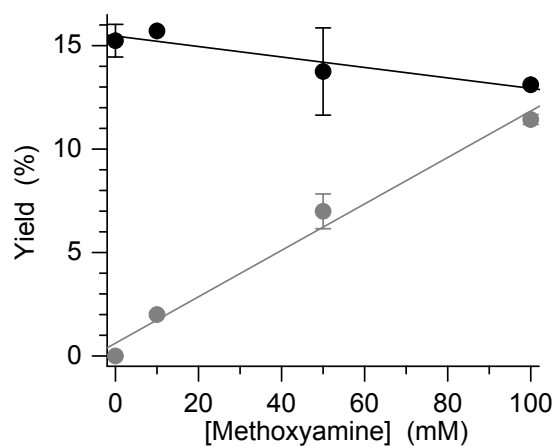

**Figure S5.** Effect of methoxyamine on product distribution from **5** under anaerobic conditions.

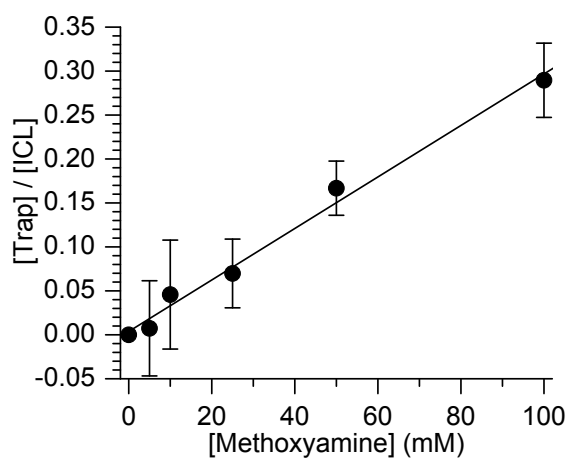

**Figure S6.** Effect of methoxyamine on interstrand cross-link formation from **5** (**17**) under anaerobic conditions.

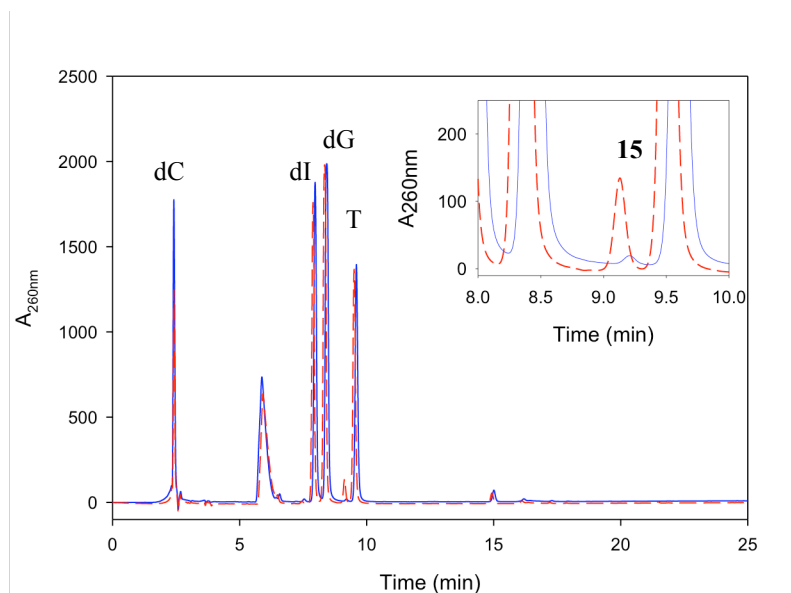

**Figure S7.** Chromatograms of digested duplex **17** photolyzed in the presence of methoxyamine (blue line represents the digested duplex, the red dashed line is the coinjection with 200 pmol of **15**).

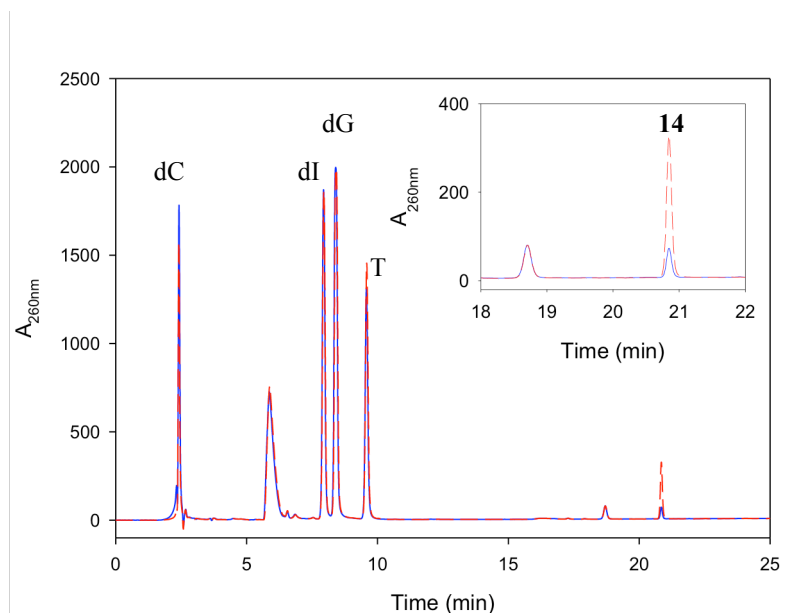

**Figure S8.** Chromatograms of digested duplex **17** photolyzed in the presence of HO-TEMPO (**13**). (blue line represents the digested duplex, the red dashed line is the coinjection with 250 pmol of **14**).

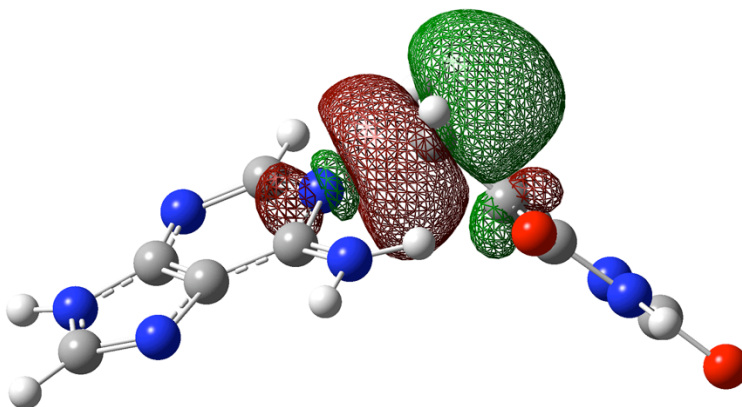

**Figure S9.** BHandHLYP/6-311G (d,p) generated depiction of the  $\text{LP}_\text{N} \rightarrow \text{SOMO}$  interaction in **21**.

**Table S2.** Effect of HO-TEMPO (**13**) on interstrand cross-link (ICLs) yields from **17** under anaerobic conditions.

| [HO-TEMPO] (mM) | ICL (%)    |
|-----------------|------------|
| 0               | 23.2 ± 0.1 |
| 1               | 22.8 ± 0.1 |
| 5               | 23.1 ± 0.5 |
| 10              | 22.8 ± 0.3 |
| 20              | 22.0 ± 0.9 |
| 100             | 22.1 ± 0.7 |

**Table S3.** Effect of HO-TEMPO (**13**) on interstrand cross-link (ICLs) yields from **17** under aerobic conditions.

| [HO-TEMPO] (mM) | ICL (%)    |
|-----------------|------------|
| 0               | 22.9 ± 1.5 |
| 0.5             | 23.2 ± 0.6 |
| 5               | 23.3 ± 0.2 |
| 50              | 23.9 ± 0.1 |

**Table S4.** Calculated energy barriers ( $\Delta E_1^\ddagger$ ) for the reaction of ademine (**17**) with the uridinylmethyl radical (**18**) (Scheme 5), and (imaginary) frequency ( $\nu$ ) for the transition state vector in **21**.

| Method                                         | $\Delta E_1^\ddagger$ | $\Delta E_1^\ddagger +$<br>ZPE | $\nu$ |
|------------------------------------------------|-----------------------|--------------------------------|-------|
| ROHF/6-31G(d)                                  | 210.7                 | 217.0                          | 1846i |
| ROHF/6-311G(d,p)                               | 213.5                 | 219.5                          | 1858i |
| BHandHLYP/6-311G(d,p)                          | 94.9                  | 103.2                          | 460i  |
| BHandHLYP/cc-pVDZ                              | 90.3                  | 97.1                           | 452i  |
| BHandHLYP/aug-cc-pVDZ                          | 99.9                  | 114.2                          | 392i  |
| BHandHLYP/6-311G(2d,p)                         | 96.5                  | 103.7                          | 464i  |
| BHandHLYP/6-311++G(2d,p)                       | 100.4                 | 108.2                          | 468i  |
| M06-2X/6-311G(d,p)                             | 58.8                  | 64.9                           | 455i  |
| ROMP2/6-311G(d,p)//BHandHLYP/6-311G(d,p)       | 65.2                  |                                |       |
| ROMP2/cc-pVDZ//BHandHLYP/cc-pVDZ               | 64.7                  |                                |       |
| ROMP2/6-311G(2d,p)//BHandHLYP/6-311G(2d,p)     | 57.9                  |                                |       |
| ROMP2/6-311++G(2d,p)//BHandHLYP/6-311++G(2d,p) | 58.1                  |                                |       |
| ROMP2/6-311G(d,p)//M06-2X/6-311G(d,p)          | 65.3                  |                                |       |

## Gaussian Archive Entries for optimized geometries for 21.

### ROHF/6-31G(d)

```
1\1\GINC-MERRI044\FTS\ROHF\6-31G(d)\C10H10N7O2(2)\SHORVAT\17-Apr-2013\
0\#\ROHF/6-31G* 6D INT(grid=ultrafine) OPT=(TS,readfc,noeigentest,maxc
yc=200) IOP(2/17=4) Freq=noraman geom=checkpoint guess=check\thyminine/
adenine radical ts\0,2\C,0.5032523234,-2.3588875548,-3.8729616905\H,0
.3675272135,-2.9373306415,-4.7641795795\N,-0.1525746527,-1.2908869192,
-3.5836257915\C,0.3459349135,-0.9055947534,-2.3535438574\C,0.100260955
4,0.2099119308,-1.5506561651\N,-0.7734351482,1.212488094,-1.8744003275
\H,-0.5708686676,2.1031483565,-1.4716282839\H,-1.0373749608,1.25018645
95,-2.8356002953\C,1.7471783053,-0.6111114562,-0.1226586153\H,2.305742
6784,-0.4348376906,0.7785556501\N,2.0799119424,-1.6282644599,-0.837953
8416\C,1.3272291672,-1.7732755104,-1.9395828174\N,1.4119679117,-2.7191
153336,-2.9273446635\H,2.0414806629,-3.4874802442,-2.9601798248\N,0.72
10992687,0.2829759014,-0.3394474773\C,-0.3854841237,0.272889436,1.1057
023987\H,0.0419451207,-0.5287425858,1.6829040215\H,-0.192689531,1.2380
040861,1.5306216815\C,-1.7799923792,0.0636160444,0.7287728306\C,-2.285
1369188,-1.1297449739,0.3842990415\C,-2.6508059876,1.2425372279,0.5822
860235\H,-1.7107501157,-2.0341530834,0.4359551665\C,-4.4664338348,-0.2
563576827,-0.1810545669\N,-3.5833734297,-1.2898509995,-0.0420806713\H,
-3.925415846,-2.184723133,-0.3104245112\O,-5.588555051,-0.4002151391,-
0.5663963785\N,-3.943146281,0.9606044931,0.1745033507\H,-4.5564122368,
1.7413718522,0.0722109361\O,-2.3225495068,2.371915098,0.8049647644\Ve
rsion=AM64L-G09RevC.01\State=2-A\HF=-915.3221327\RMSD=7.414e-09\RMSF=6
.434e-06\Dipole=1.292966,-1.7488343,-0.3664768\Quadrupole=-12.6602956,
8.3003253,4.3599703,-2.2546981,-3.9311686,0.5669545\PG=C01 [X(C10H10N7
O2)]\@
```

### ROHF/6-311G(d,p)

```
1\1\GINC-MERRI044\FTS\ROHF\6-311G(d,p)\C10H10N7O2(2)\SHORVAT\17-Apr-20
13\0\#\ROHF/6-311G** 6D INT(grid=ultrafine) OPT=(TS,readfc,noeigentest
,maxcyc=200) IOP(2/17=4) Freq=noraman geom=checkpoint guess=check\thy
mine/adenine radical ts\0,2\C,0.5544282166,-2.3552418113,-3.878077705
7\H,0.433457313,-2.9371138307,-4.769969944\N,-0.1315091074,-1.30879400
```

52,-3.5868531212\C,0.356883986,-0.9083192665,-2.3573339407\C,0.0806812  
883,0.1991537484,-1.5538988853\N,-0.8089933737,1.1862704374,-1.8842430  
5\H,-0.6147459166,2.0821044255,-1.4920225983\H,-1.0785992086,1.2050482  
044,-2.8426710146\C,1.7556104661,-0.5722651836,-0.1326711682\H,2.31251  
39375,-0.3794343241,0.7671787847\N,2.1164470021,-1.5767913572,-0.84896  
34383\C,1.3632296055,-1.7459723145,-1.9460989696\N,1.47627614,-2.68799  
37863,-2.9346329444\H,2.1253445364,-3.4376686341,-2.9671249317\N,0.700  
9064544,0.2879249524,-0.3449257505\C,-0.3966626317,0.2201774389,1.1097  
199672\H,0.0271258722,-0.6133436035,1.6434439239\H,-0.1919356882,1.165  
1443429,1.5740655474\C,-1.7947473774,0.0388527404,0.7330840121\C,-2.31  
79135434,-1.1396654397,0.3704074338\C,-2.6505773142,1.2324676099,0.614  
3555354\H,-1.7541506637,-2.0522663929,0.405805399\C,-4.4893378326,-0.2  
27648883,-0.1697376243\N,-3.6180712775,-1.2746296991,-0.0576569578\H,-  
3.9724939993,-2.1598106197,-0.3351365787\O,-5.6096056415,-0.3486221693  
,-0.549233803\N,-3.948219639,0.9757196848,0.2055848224\H,-4.5515037958  
,1.7644782693,0.1227629554\O,-2.3053060159,2.3473162853,0.8519005514\\  
Version=AM64L-G09RevC.01\State=2-A\HF=-915.5446845\RMSD=3.943e-09\RMSF  
=1.146e-05\Dipole=1.2675493,-1.7617657,-0.4190002\Quadrupole=-12.24744  
25,8.2293744,4.0180682,-2.4153309,-4.0515167,0.5579053\PG=C01 [X(C10H1  
0N7O2)]\@

# BHandHLYP/6-311G(d,p)

1\1\GINC-MERRI060\FTS\UBHandHLYP\6-311G(d,p)\C10H10N7O2(2)\SHORVAT\27-  
Mar-2013\0\0\#BHandHLYP/6-311G\*\* 6D INT(grid=ultrafine) OPT=(TS,readfc,  
noeigentest,maxcyc=200) IOP(2/17=4) Freq=noraman geom=checkpoint guess  
=check\\thymine/adenine radical ts\\0,2\C,1.8274824604,-1.5374069691,-  
4.5044220189\H,2.1639533154,-1.709423479,-5.507809202\N,1.1112264634,-  
0.5339091378,-4.1190011624\C,0.9353621882,-0.7407900828,-2.7754104272\  
C,0.2249692943,0.0007273605,-1.8142801884\N,-0.4280012944,1.106151795,  
-2.1094379064\H,-1.0999244082,1.5609335576,-1.4747188076\H,-0.43463755  
56,1.3689467045,-3.0745344778\C,0.9259602006,-1.6355661949,-0.28968381  
83\H,0.8902970291,-1.9436295825,0.741765151\N,1.5830536891,-2.38977996  
08,-1.1218869105\C,1.5631627486,-1.895342389,-2.3623031333\N,2.1350215  
75,-2.4010575844,-3.4864733408\H,2.6695508428,-3.2434483937,-3.5447517



442\N,0.2737308277,-0.4946573619,-0.5604438882\C,-0.6110118015,0.30582  
01167,0.7834629163\H,-0.057210165,-0.1841422786,1.5698582113\H,-0.2799  
785326,1.3136336133,0.603023389\C,-2.0066451996,0.1159442105,0.7800593  
136\C,-2.6350468084,-1.040377663,1.3382594909\C,-2.8018227875,1.100888  
2139,0.1404519713\H,-2.1406356691,-1.6589365412,2.0662252784\C,-4.8452  
754035,-0.1056880645,0.8493701738\N,-4.0356953699,-1.0423497378,1.4015  
716057\H,-4.5200044241,-1.8260180199,1.7865095943\O,-6.0479125364,-0.1  
639952542,0.8618358216\N,-4.1707691397,0.9417875963,0.2481931796\H,-4.  
7439903387,1.639809494,-0.1822680201\O,-2.3766774086,2.0709528517,-0.4  
961045444\\Version=AM64L-G09RevC.01\State=2-A\HF=-920.4854706\S2=0.759  
89\S2-1=0.\S2A=0.750051\RMSD=9.181e-09\RMSF=7.237e-06\Dipole=3.2739991  
,-1.6250425,-1.2770185\Quadrupole=-11.4623297,1.2420596,10.2202701,-3.  
6937055,-2.452673,3.015119\PG=C01 [X(C10H10N7O2)]\@

## BHandHLYP/cc-pVDZ

1\1\GINC-MERRI016\FTS\UBHandHLYP\CC-pVDZ\C10H10N7O2(2)\SHORVAT\27-Mar-  
2013\0\#\BHandHLYP/cc-pvdz 6D INT(grid=ultrafine) OPT=(TS,readfc,noeig  
entest,maxcyc=200) IOP(2/17=4) Freq=noraman geom=checkpoint guess=chec  
k\thymine/adenine radical ts\0,2\C,1.8377829474,-1.5334025243,-4.514  
1936627\H,2.17735349,-1.7039197404,-5.5249818446\N,1.1081584036,-0.532  
8751394,-4.1291983653\C,0.9375251215,-0.7434658315,-2.7832270295\C,0.2  
201391493,-0.0077854019,-1.8172193372\N,-0.4450094693,1.0940679571,-2.  
10797083\H,-1.1243255513,1.5463372575,-1.4667092748\H,-0.4546231386,1.  
3541863168,-3.0786306992\C,0.9432988728,-1.6404986887,-0.2928479169\H,  
0.9123088471,-1.9496738388,0.7464421276\N,1.6105659272,-2.3924221538,-  
1.125783865\C,1.5805855311,-1.8942043173,-2.3687888316\N,2.1568800412,  
-2.3942370154,-3.4954663706\H,2.7036341973,-3.233630324,-3.5567977158\  
N,0.2758752912,-0.5047572637,-0.5610022498\C,-0.6129567716,0.295932222  
1,0.7864345561\H,-0.0540422455,-0.2012941764,1.5748971641\H,-0.2784391  
038,1.3089406441,0.5970780634\C,-2.0118045035,0.1103314536,0.785022503  
\C,-2.650570682,-1.0408805055,1.3511595224\C,-2.8036042163,1.100907445  
4,0.1417850314\H,-2.1575360213,-1.6612046884,2.0907242076\C,-4.8540619  
678,-0.0893635394,0.8554657324\N,-4.0515890924,-1.0292645759,1.4168806

876\H,-4.5466496881,-1.8146113237,1.7968765956\O,-6.0612031241,-0.1436  
 398654,0.8610970553\N,-4.1731162704,0.9569190322,0.2559325727\H,-4.745  
 6087631,1.6547612598,-0.1862244756\O,-2.3704354189,2.0678241441,-0.503  
 696844\\Version=AM64L-G09RevC.01\State=2-A\HF=-920.3300653\S2=0.759955  
 \S2-1=0.\S2A=0.750052\RMSD=7.341e-09\RMSF=4.404e-07\Dipole=3.1589321,-  
 1.5637333,-1.2765861\Quadrupole=-10.8838889,1.3105088,9.5733802,-3.775  
 7633,-2.585439,2.922077\PG=C01 [X(C10H10N7O2)]\\@

### BHandHLYP/aug-cc-pVDZ

1\1\GINC-MERRI022\FTS\ROBHandHLYP\Aug-CC-pVDZ\C10H10N7O2(2)\SHORVAT\06  
 -May-2013\0\\#BHandHLYP/aug-cc-pvdz scf=(conver=5) 6D INT(grid=ultrafi  
 ne) OPT=(TS,readfc,noeigentest,maxcyc=200) IOP(2/17=4) Freq=noraman ge  
 om=checkpoint guess=check\\thymine/adenine radical ts\\0,2\C,-4.614380  
 7282,-0.8400948877,-1.087070129\H,-5.4819553373,-1.2786302225,-1.55100  
 1428\N,-3.5757792429,-1.4954801861,-0.6713722714\C,-2.7452536356,-0.52  
 61804907,-0.1614314799\C,-1.4633715992,-0.6146323775,0.4164472863\N,-0  
 .822390966,-1.7621699774,0.5600918012\H,0.167123714,-1.8377291435,0.83  
 77814881\H,-1.2838872019,-2.5775750887,0.2050143847\C,-1.5932061869,1.  
 7138363798,0.6514529925\H,-1.0754175193,2.5938393723,1.0095015263\N,-2  
 .7684976223,1.8878031776,0.1081450882\C,-3.310755701,0.7279783706,-0.2  
 822693277\N,-4.5151819942,0.5120506064,-0.880998969\H,-5.1893273841,1.  
 2121323173,-1.1230437193\N,-0.9343160406,0.5577175258,0.8272495207\C,0  
 .7234878825,0.6277445651,1.6166603266\H,0.570192387,1.6177042575,2.028  
 9077995\H,0.5616505973,-0.1699731006,2.3273704906\C,1.8096211257,0.462  
 9931274,0.7383312389\C,2.3632953311,1.5408069228,-0.0235804784\C,2.328  
 4067017,-0.8503943161,0.5605620728\H,2.1973580015,2.5742691415,0.24269  
 15994\C,4.1011163824,0.0611724656,-0.9031885379\N,3.5401738426,1.28540  
 26174,-0.7385584279\H,3.9741711758,2.0117286331,-1.2729169641\O,5.0796  
 90297,-0.1445465967,-1.5880532611\N,3.4593794554,-0.9608550949,-0.2276  
 208492\H,3.8475282026,-1.8774030943,-0.3497511776\O,1.8485923882,-1.88  
 74362269,1.0426323998\\Version=AM64L-G09RevC.01\State=2-A\HF=-920.3890  
 672\RMSD=4.718e-06\RMSF=3.982e-06\Dipole=-3.6455986,1.1468182,0.167279  
 3\Quadrupole=-0.3252967,1.8975609,-1.5722642,3.5182508,11.6847914,1.53

63668\PG=C01 [X(C10H10N7O2)]\@

### BHandHLYP/6-311G(2d,p)

1\1\GINC-MERRI016\FTS\UBHandHLYP\6-311G(2d,p)\C10H10N7O2(2)\SHORVAT\27  
-Mar-2013\0\#\BHandHLYP/6-311G(2d,p) 6D INT(grid=ultrafine) OPT=(TS,readfc, noeigentest, maxcyc=200) IOP(2/17=4) Freq=noraman geom=checkpoint  
guess=check\thymine/adenine radical ts\0,2\C,1.8125691766,-1.5414570  
259,-4.5015463878\H,2.144238502,-1.7150003205,-5.5058301785\N,1.089818  
6441,-0.5445326989,-4.1175707502\C,0.924447906,-0.7459063646,-2.772353  
3208\C,0.2155892175,-0.0093651388,-1.8106478692\N,-0.448680407,1.08830  
51822,-2.1024103302\H,-1.1143735233,1.5417857239,-1.4598936035\H,-0.46  
86879694,1.3458889571,-3.0681101388\C,0.9404712847,-1.6281182479,-0.28  
68479387\H,0.9148802117,-1.9321472076,0.7457200186\N,1.5994440501,-2.3  
776097424,-1.1188591325\C,1.5654981029,-1.8895032846,-2.3598834235\N,2  
.1349832454,-2.3950489526,-3.4834308743\H,2.6775062098,-3.2312377136,-  
3.5427765608\N,0.2758478536,-0.4983234323,-0.5579171988\C,-0.610112614  
9,0.3041416674,0.7897671573\H,-0.0569126401,-0.1910724305,1.5719558438  
\H,-0.2765772195,1.3097338327,0.6083070863\C,-2.0025013357,0.118927748  
8,0.7841426814\C,-2.6340443789,-1.0363521516,1.3323517191\C,-2.7936108  
816,1.1091759763,0.1524492146\H,-2.1436512041,-1.655273103,2.062326917  
5\C,-4.8331973608,-0.1008897778,0.8327266326\N,-4.0318239857,-1.037733  
1784,1.3892903647\H,-4.5205161611,-1.8323250763,1.7435640601\O,-6.0352  
61324,-0.1674905786,0.82338968\N,-4.160183332,0.9575478679,0.257684102  
\H,-4.7310921104,1.6509295682,-0.1815083495\O,-2.3655361641,2.08202672  
01,-0.4770329145\Version=AM64L-G09RevC.01\State=2-A\HF=-920.5115921\S  
2=0.760249\S2-1=0.\S2A=0.750055\RMSD=5.799e-09\RMSF=5.116e-06\Dipole=3  
.1979303,-1.5971908,-1.2658021\Quadrupole=-11.1780045,1.3238366,9.8541  
678,-3.8467555,-2.5926875,2.9928387\PG=C01 [X(C10H10N7O2)]\@

### BHandHLYP/6-311++G(2d,p)

1\1\GINC-MERRI004\FTS\UBHandHLYP\6-311++G(2d,p)\C10H10N7O2(2)\SHORVAT\  
28-Mar-2013\0\#\BHandHLYP/6-311++G(2d,p) 6D INT(grid=ultrafine) OPT=(T  
S,readfc, noeigentest, maxcyc=200) IOP(2/17=4) Freq=noraman geom=checkpo

```

int guess=check\\thymine/adenine radical ts\\0,2\C,1.8434848665,-1.534
5172099,-4.5042442502\H,2.1858783765,-1.7028792097,-5.5057051202\N,1.1
172042578,-0.5387895747,-4.1225146905\C,0.9358719012,-0.7458418026,-2.
7798355569\C,0.2169483195,-0.0143835163,-1.8223773024\N,-0.4442687495,
1.0862786767,-2.1155652438\H,-1.1132889599,1.536623566,-1.4765581932\H
,-0.4527267745,1.3567281082,-3.0781381595\C,0.9236925744,-1.6396301572
,-0.297664356\H,0.8893905331,-1.9492945141,0.7327360407\N,1.5906985144
,-2.3853292119,-1.1278108193\C,1.5713806788,-1.8923195549,-2.366791630
8\N,2.1532624385,-2.3934196573,-3.4866000898\H,2.6960163839,-3.2299835
738,-3.544904917\N,0.2624367995,-0.5087218017,-0.5712030183\C,-0.61822
88849,0.3031184334,0.7873515841\H,-0.0630570196,-0.1968310299,1.564385
4767\H,-0.2767926788,1.3052019907,0.6023843717\C,-2.0113181947,0.12276
78281,0.789258102\C,-2.6420247663,-1.0285041311,1.3427435863\C,-2.8061
278588,1.1071961191,0.151786988\H,-2.1434024152,-1.6659359846,2.049287
1884\C,-4.8408729173,-0.0927172475,0.8587448997\N,-4.0376092736,-1.026
048084,1.4171602166\H,-4.5230563971,-1.8136771158,1.791965117\O,-6.045
8651659,-0.1538953309,0.8671247596\N,-4.1728015475,0.9531938711,0.2581
536127\H,-4.7471245721,1.646735757,-0.1777334237\O,-2.3791676769,2.073
9511763,-0.4883786656\\Version=AM64L-G09RevC.01\State=2-A\HF=-920.5306
898\S2=0.760939\S2-1=0.\S2A=0.750061\RMSD=3.554e-09\RMSF=1.265e-06\Dip
ole=3.3308523,-1.6428258,-1.2234538\Quadrupole=-11.9647418,1.3025467,1
0.662195,-3.53201,-2.4217263,3.0734337\PG=C01 [X(C10H10N7O2)]\\@

```

## M06-2X/6-311G(d,p

```

1\1\GINC-MERRI017\FTS\UM062X\6-311G(d,p)\C10H10N7O2(2)\SHORVAT\27-Mar-
2013\0\\#M062X/6-311G** 6D INT(grid=ultrafine) OPT=(TS,readfc,noeigent
est,maxcyc=200) IOP(2/17=4) Freq=noraman geom=checkpoint guess=check\\
thymine/adenine radical ts\\0,2\C,1.6628227901,-1.6055992741,-4.492993
7522\H,1.9424224309,-1.8143588619,-5.5144401751\N,1.0032279913,-0.5559
049806,-4.0931613948\C,0.8914094411,-0.7317017911,-2.7338266054\C,0.24
9548684,0.0553292157,-1.750313126\N,-0.397088198,1.1748146461,-2.04144
30002\H,-1.0458867352,1.655214954,-1.3869973607\H,-0.4494412555,1.4071
23298,-3.0223863847\C,0.9724777346,-1.5806110094,-0.216047166\H,0.9752
439859,-1.8617696287,0.8327059905\N,1.5573538774,-2.3890122653,-1.0668

```

57851\C,1.4946666607,-1.9104659064,-2.3204877543\N,1.9880356965,-2.464  
8773888,-3.4684732646\H,2.4881511012,-3.337956037,-3.5332866842\N,0.35  
52365355,-0.4109468153,-0.4845969716\C,-0.5676480472,0.3935397512,0.84  
91051227\H,-0.0166996546,-0.0924086834,1.6517925826\H,-0.2575027583,1.  
4184136027,0.6748602128\C,-1.9582436953,0.1542308092,0.789875314\C,-2.  
5623452479,-1.0429720567,1.2703077114\C,-2.7713861664,1.1437841738,0.1  
491394204\H,-2.0560439226,-1.7252902013,1.9382686436\C,-4.8004251433,-  
0.197378866,0.7070581117\N,-3.9628952456,-1.130817841,1.2440448924\H,-  
4.4300052783,-1.9599868142,1.5746155654\O,-6.0051235245,-0.311603797,0  
.6555299964\N,-4.1415100242,0.9222271269,0.197883652\H,-4.7333763415,1  
.6187642332,-0.2320881995\O,-2.3564438991,2.159297226,-0.430731019\\ve  
rsion=AM64L-G09RevC.01\State=2-A\HF=-920.6773229\S2=0.758367\S2-1=0.\S  
2A=0.750035\RMSD=5.933e-09\RMSF=1.920e-06\Dipole=2.9505803,-1.5874984,-  
-1.198524\Quadrupole=-11.8084857,1.8004086,10.0080771,-4.2504621,-2.83  
12329,3.1277721\PG=C01 [X(C10H10N7O2)]\\@
